# Supplementary material for: Improved detection sensitivity of γ-aminobutyric acid based on graphene oxide interface on an optical microfiber
Source: Royal Society of Chemistry journal article supplement (doi:10.1039/c8cp01626g), 2018-01-01
Supplement: c8cp01626g1.pdf [file c8cp01626g1.pdf]

Supplementary data

## Improved detection sensitivity of $\gamma$ -aminobutyric acid based on graphene oxide interface on an optical microfiber

Jun Zhou, Yunyun Huang\*, Chaoyan Chen, Aoxiang Xiao, Tuan Guo, Bai-ou Guan

Guangdong Provincial Key Laboratory of Optical Fiber Sensing and

Communications, Institute of Photonics Technology, Jinan University, Guangzhou

510632, China

\*Address correspondence to email: [yingyueabc@126.com](mailto:yingyueabc@126.com)

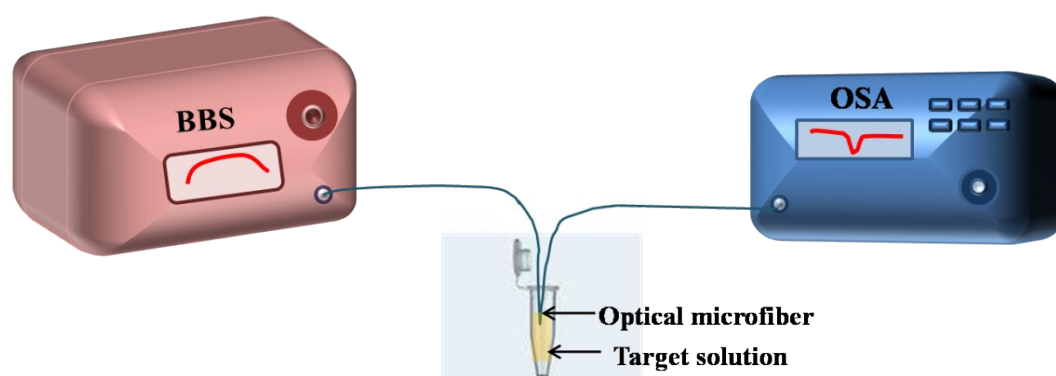

**Fig. S1.** Pictorial representation of the optical setup for measuring the spectra of optical microfiber.

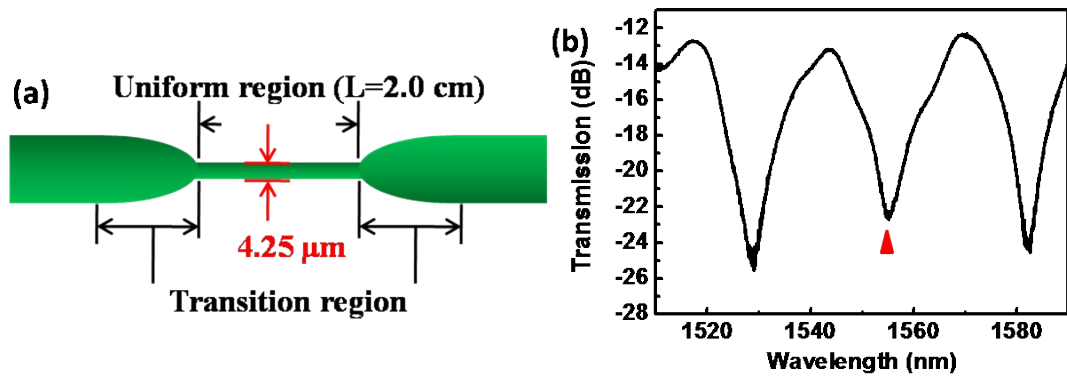

**Fig. S2.** (a) Schematic geometry and (b) transmission spectrum of the silica microfiber interferometer

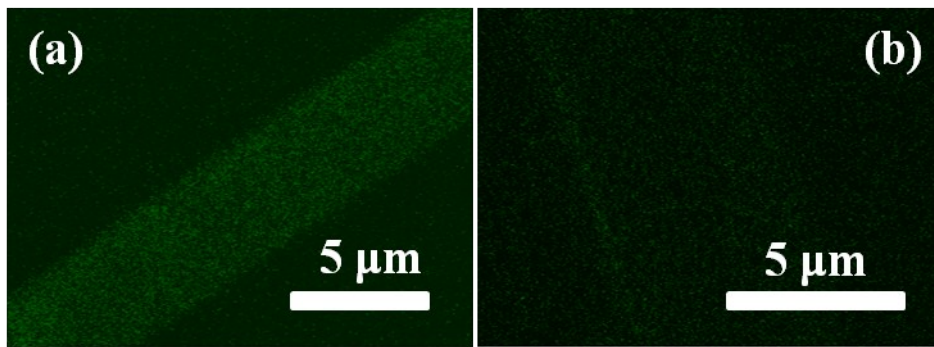

**Fig. S3.** Laser confocal images of the sensor surface with fluorescently-labeled bio-recognition coating (a: without GO interface; b: with GO interface).
